# Supplementary material for: Unveiling the thermolysis natures of ZIF-8 and ZIF-67 by employing in situ structural characterization studies
Source: Royal Society of Chemistry journal article supplement (doi:10.1039/c9cp02582k), 2019-01-01
Supplement: c9cp02582k1.pdf [file c9cp02582k1.pdf]

## Supporting Information

# Unveiling thermolysis pathways of ZIF-8 and ZIF-67 by employing *in situ* structural characterizations

Chunhui Wu,<sup>b</sup> Donggang Xie,<sup>b</sup> Yingjie Mei,<sup>a</sup> Zhifeng Xiu,<sup>b</sup> Kristin M. Poduska,<sup>c</sup> Dacheng Li,<sup>d</sup> Ben Xu,<sup>a, b\*</sup> and Daofeng Sun<sup>a, b</sup>

a. College of Material Science and Engineering, China University of Petroleum (East China), Qingdao, Shandong, 266580, People's Republic of China.

b. College of Science, China University of Petroleum (East China), Qingdao, Shandong, 266580, People's Republic of China.

c. Department of Physics and Physical Oceanography, Memorial University of Newfoundland, St. John's, NL, A1B3X7, Canada.

d. Shandong Provincial Key Laboratory of Chemical Energy Storage and Novel Cell Technology, School of Chemistry and Chemical Engineering, Liaocheng University, Liaocheng, 252059, People's Republic of China

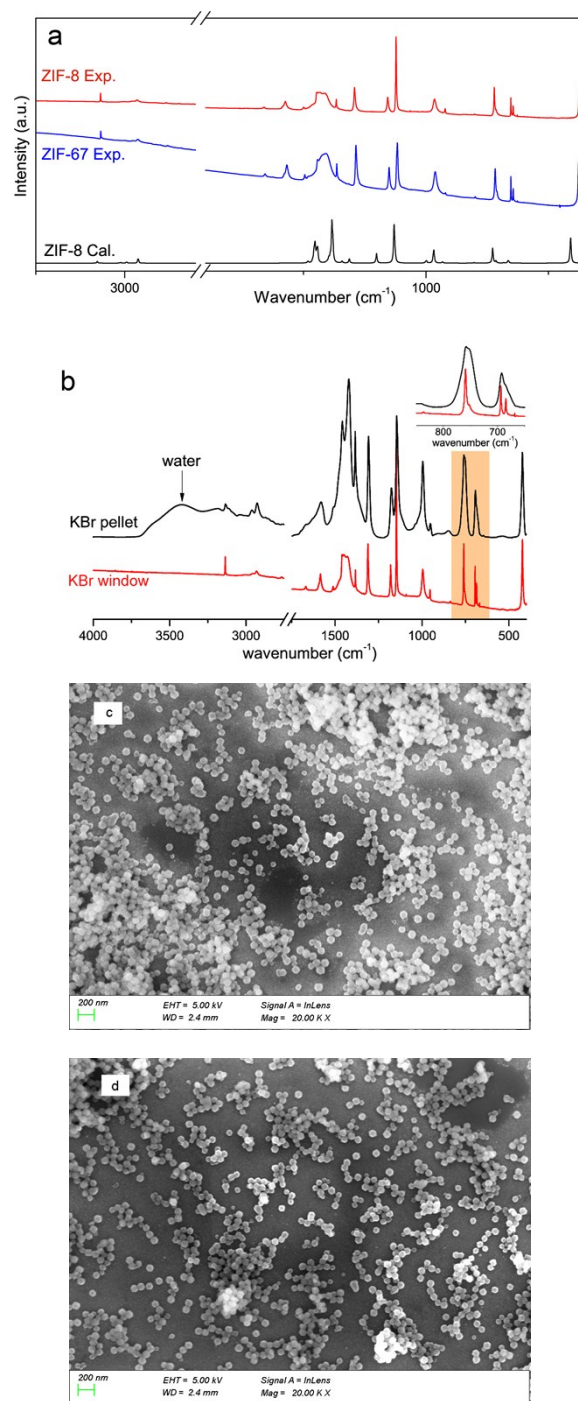

Fig. S1 The *ex situ* FTIR spectra of ZIF-8 and ZIF-67 (a), and comparison between the FTIR spectra of ZIF-8 collected using KBr pellets and KBr windows. The inset shows the zoomed-in peaks from 850 to 650 cm<sup>-1</sup>. The spectrum collected using the KBr window (b) displays much sharper and narrower peaks. The narrower peaks are due to the smaller and more uniform ZIF-8 particle sizes during the KBr window measurement. Representative SEM images of “drop-coated” ZIF-8 and ZIF-67 samples are shown in (c) and (d).

Table S1. Peak positions and vibrational mode assignments for ZIF-8 (experiment and calculated) and ZIF-67 (experiment).

| Band assignment <sup>a</sup>                                   | ZIF-8 Exp. (cm <sup>-1</sup> ) | ZIF-67 Exp. (cm <sup>-1</sup> ) | ZIF-8 Cal. (cm <sup>-1</sup> ) <sup>b</sup> |
|----------------------------------------------------------------|--------------------------------|---------------------------------|---------------------------------------------|
| Methyl in-plane bend (S)                                       | 422                            | 425                             | 410 (-12)                                   |
| Ring out-of-plane bend (M)                                     | 685                            | 685                             | 665 (-20)                                   |
| Methyl stretch (S)                                             | 694                            | 694                             | 683 (-11)                                   |
| H <sub>ring</sub> symmetric out-of-plane bend (S)              | 759                            | 756                             | 728 (-31)                                   |
| H <sub>ring</sub> asymmetric out-of-plane bend (VW)            | 837                            | 8359                            | 804 (-33)                                   |
| Ring in-plane bend (W/VW)                                      | 953                            | 952                             | 932 (-21)                                   |
| H <sub>methyl</sub> bend (S)                                   | 995                            | 992                             | 971 (-24)                                   |
| H <sub>ring</sub> scissor + H <sub>methyl</sub> bend (VW)      | 1091                           | -                               | 998 (-93)                                   |
| H <sub>ring</sub> wag (VS/S)                                   | 1147                           | 1142                            | 1130 (-17)                                  |
| Ring breathing (C-N symmetric stretch) (S)                     | 1180                           | 1175                            | 1201 (21)                                   |
| H <sub>methyl</sub> scissor(M)                                 | 1311                           | 1304                            | 1312 (1)                                    |
| Ring deformation (C-N asymmetric stretch) (S)                  | 1380                           | 1381                            | 1342 (-38)                                  |
| H <sub>methyl</sub> bend (S)                                   | 1400~1500                      | 1400~1500                       | 1380~1420                                   |
| C=C stretch+C <sub>ring</sub> -C <sub>methyl</sub> stretch (W) | 1512                           | 1507                            | 1442 (-70)                                  |
| Ring breathing (C=C stretch) (M)                               | 1584                           | 1578                            | 1452 (-132)                                 |
| H <sub>methyl</sub> symmetric stretch (W)                      | 2932                           | 2927                            | 2926 (-6)                                   |
| H <sub>methyl</sub> asymmetric stretch (VW)                    | 2957                           | 2954                            | 2989 (35)                                   |
| H <sub>ring</sub> symmetric stretch (M)                        | 3136                           | 3135                            | 3154 (18)                                   |

<sup>a</sup> S, M, W, and VW indicate strong, medium, weak, and very weak peak intensities, respectively.

<sup>b</sup> The values in parentheses indicate differences between experimental and calculated results.

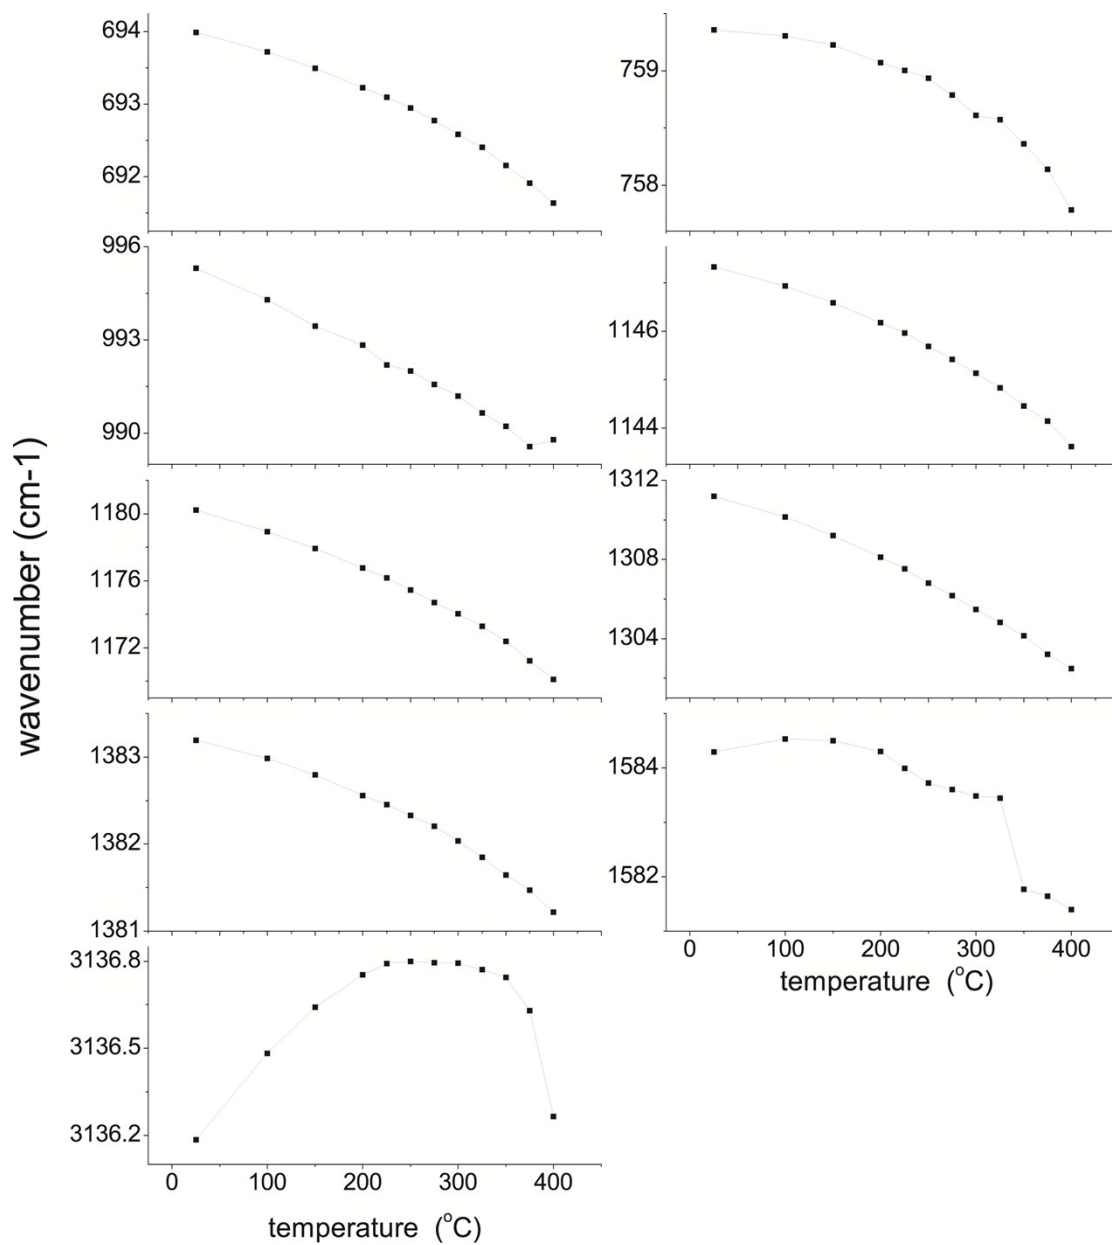

Figure S2 The peak position changes in temperature-dependent IR spectra of ZIF-8.

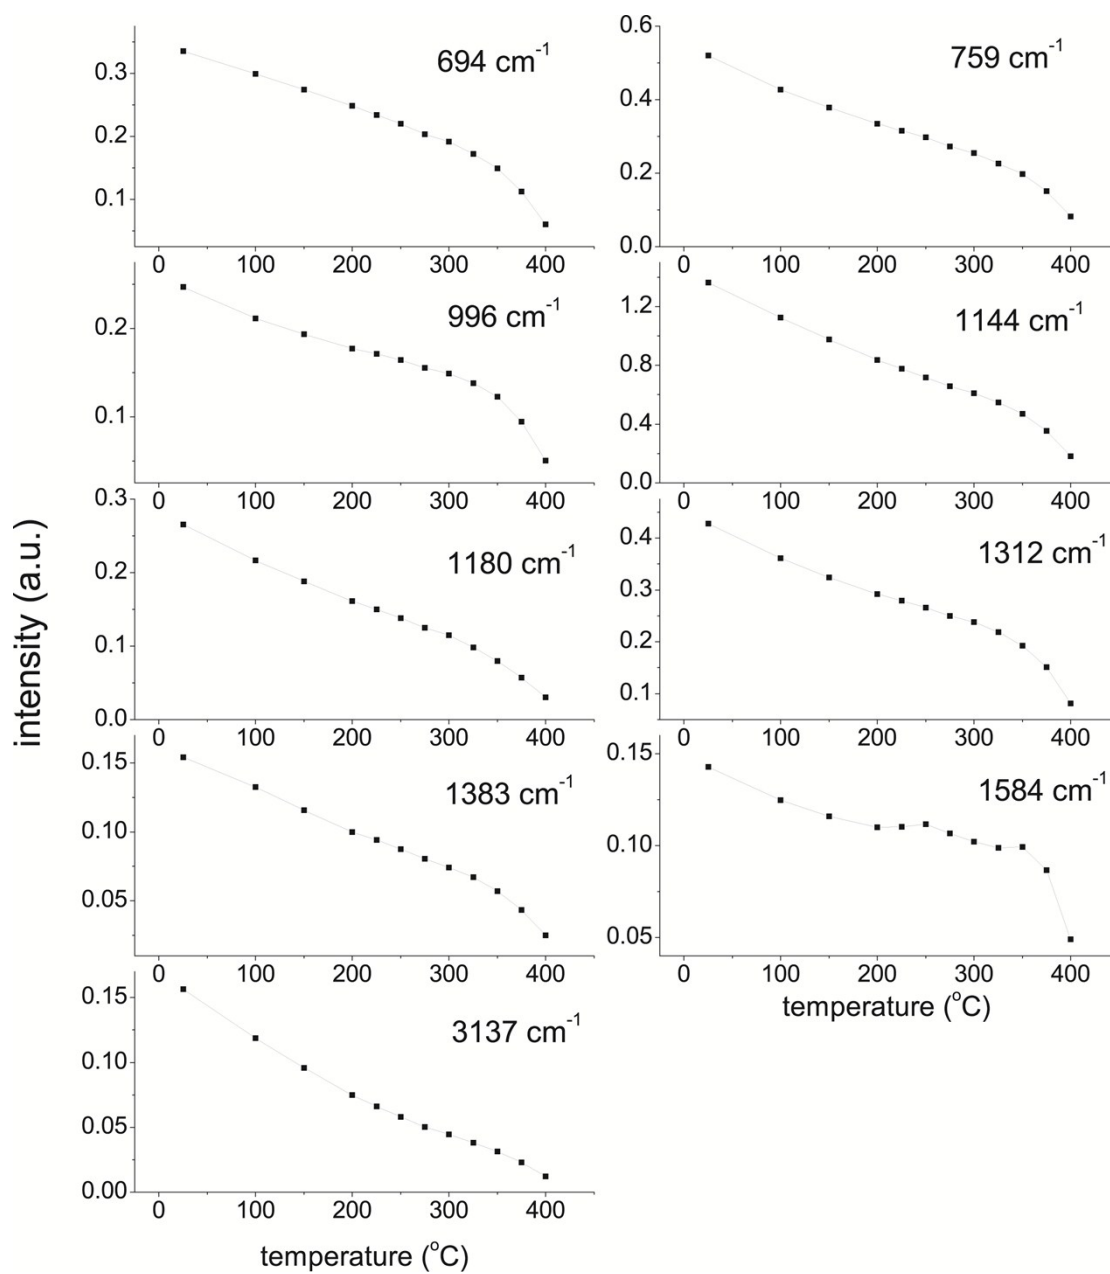

Figure S3 The peak intensity changes in temperature-dependent IR spectra of ZIF-8.

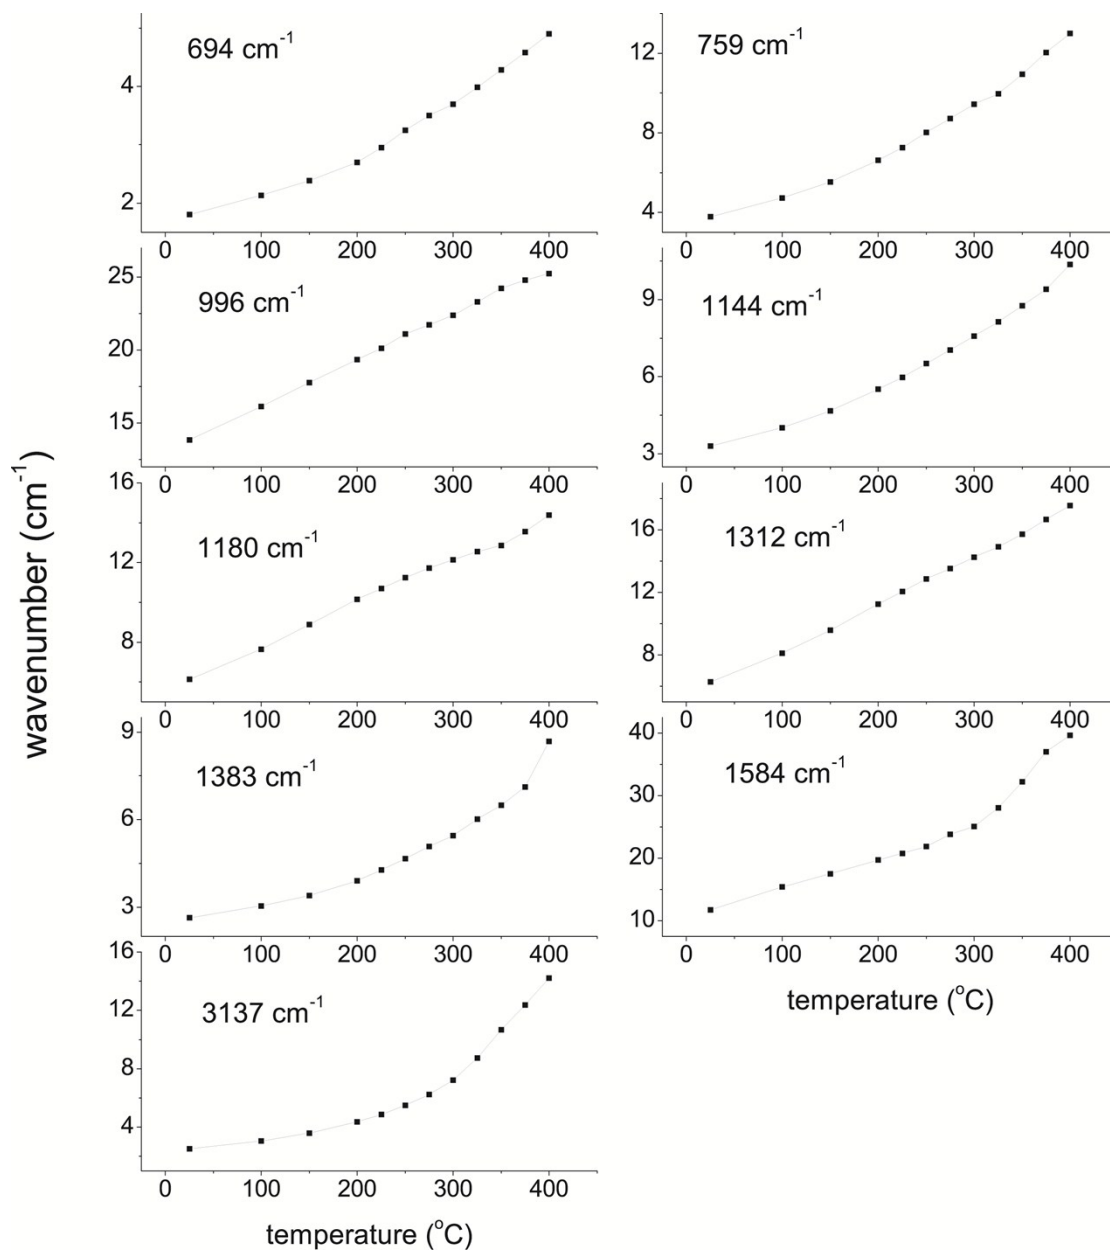

Figure S4 The peak width changes in temperature-dependent IR spectra of ZIF-8.

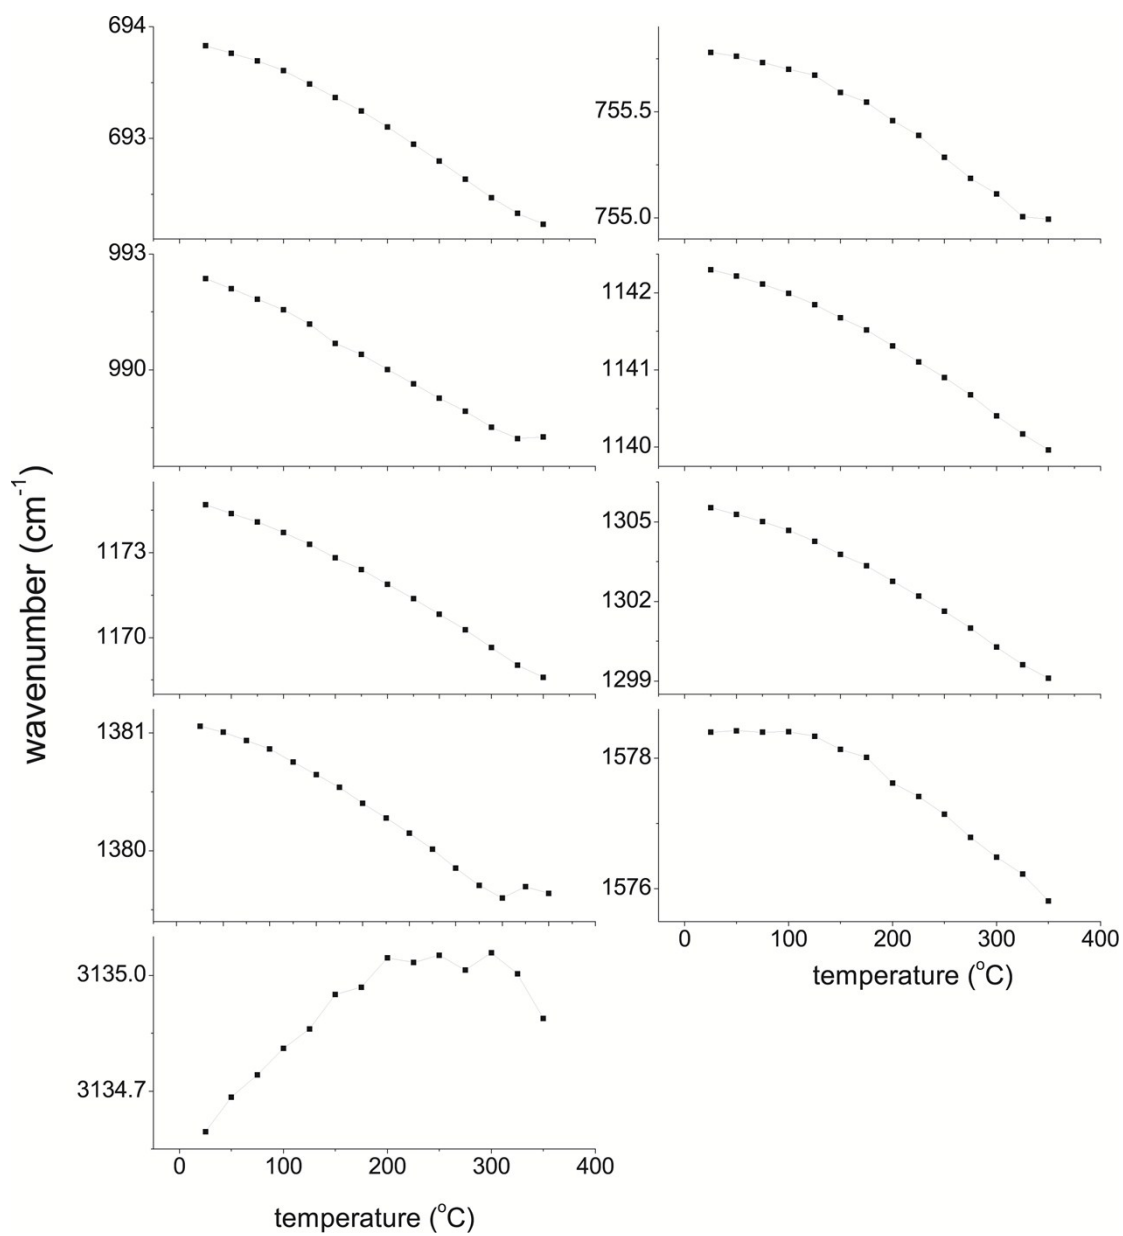

Figure S5 The peak position changes in temperature-dependent IR spectra of ZIF-67.

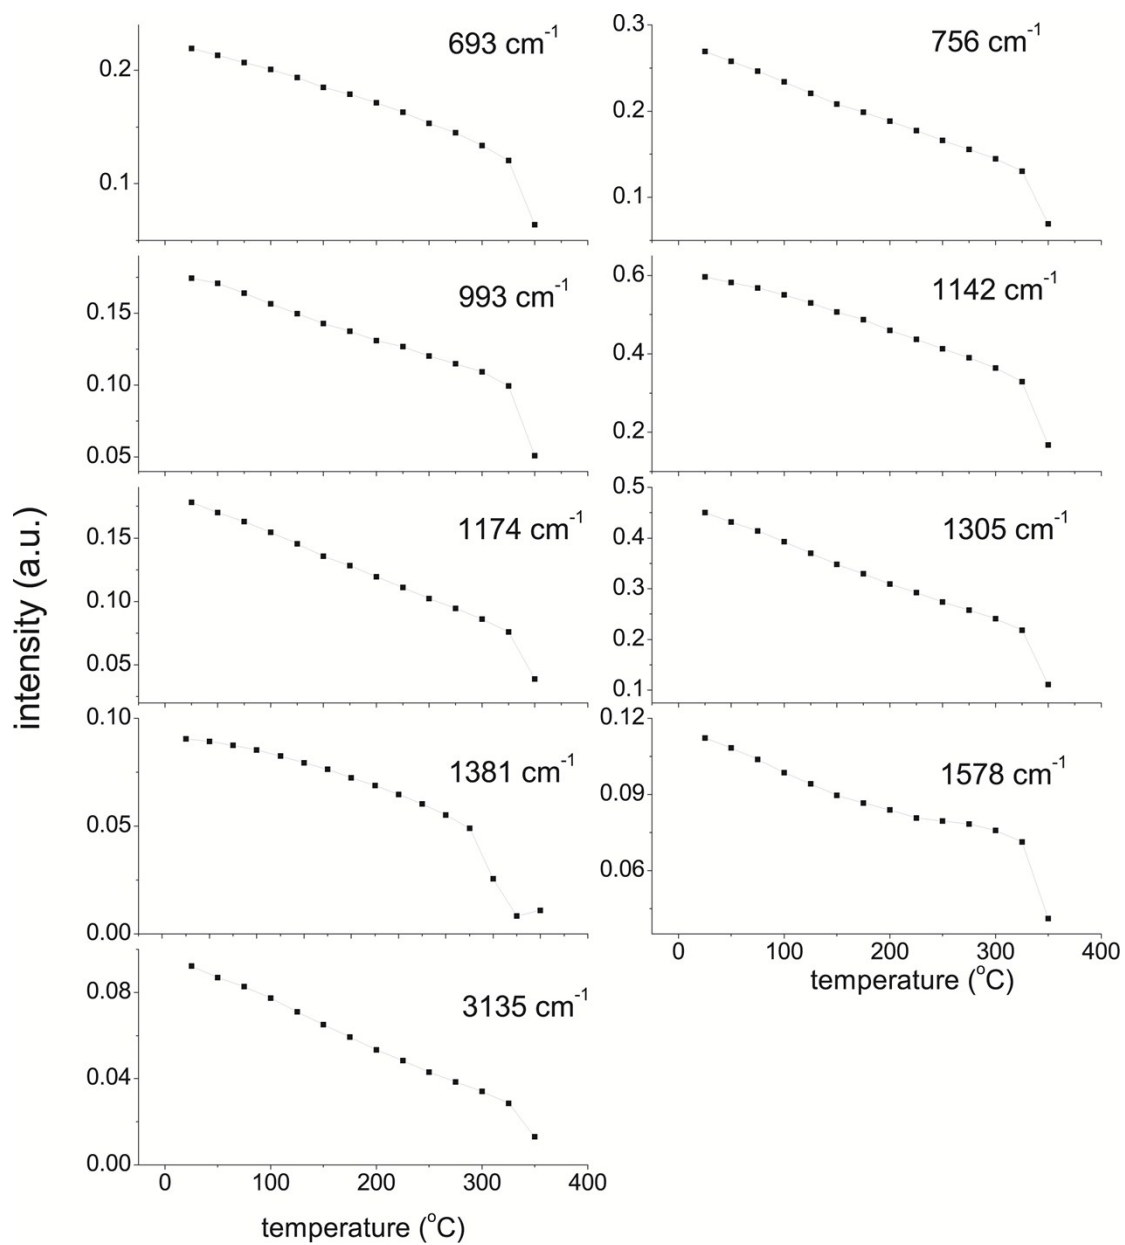

Figure S6 The peak intensity changes in temperature-dependent IR spectra of ZIF-67.



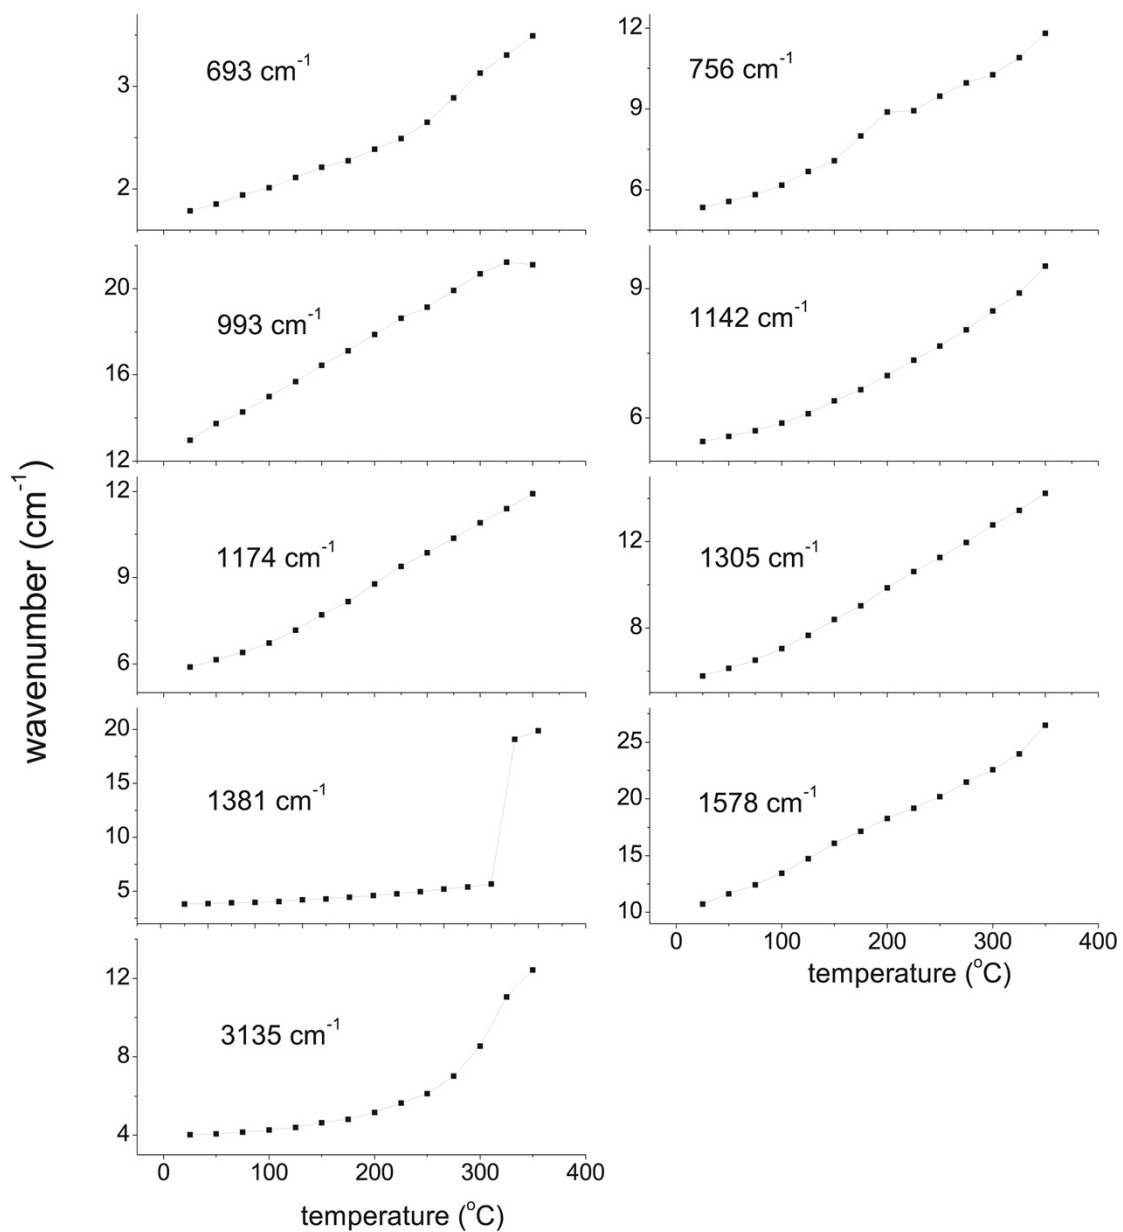

Figure S7 The peak width changes in temperature-dependent IR spectra of ZIF-67.

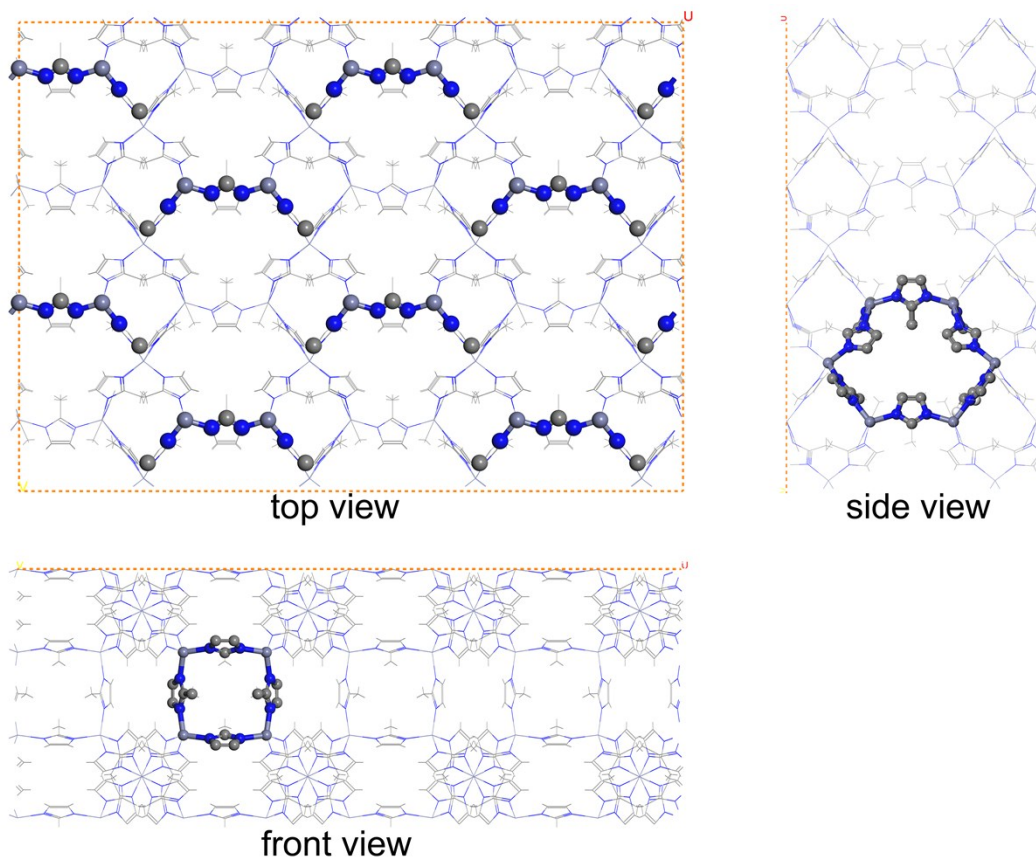

Fig. S8 The (011) plane of ZIF-8. The Co-N bonds are on this plane. The inter-planar distances are associated with the ZIF-8 frame. Hydrogen atoms are hidden for clarity.

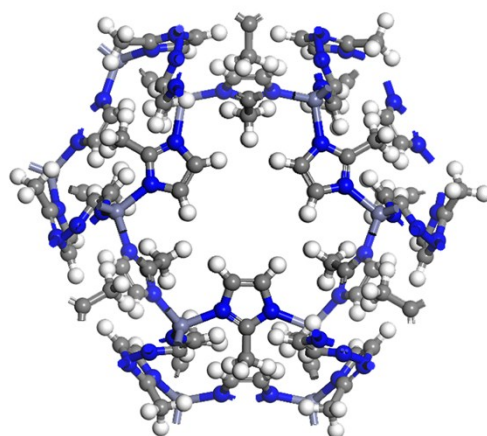

ZIF-8 lattice

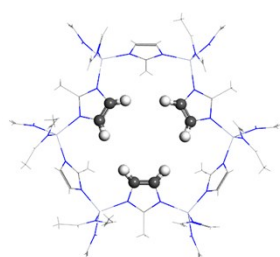

“windows”

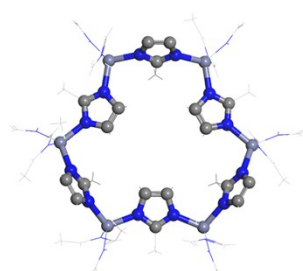

imidazole/Zn frames

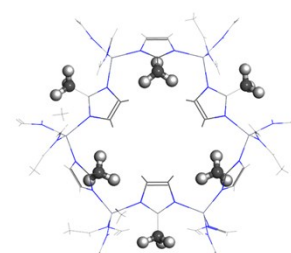

methyls

Figure S9 The lattice of ZIF-8/67. The lattice is composed of “window” fractions, “imidazole-metal” fractions, and “methyl” fractions. Zinc, nitrogen, carbon, and hydrogen atoms are purple, blue, grey, and white, respectively.

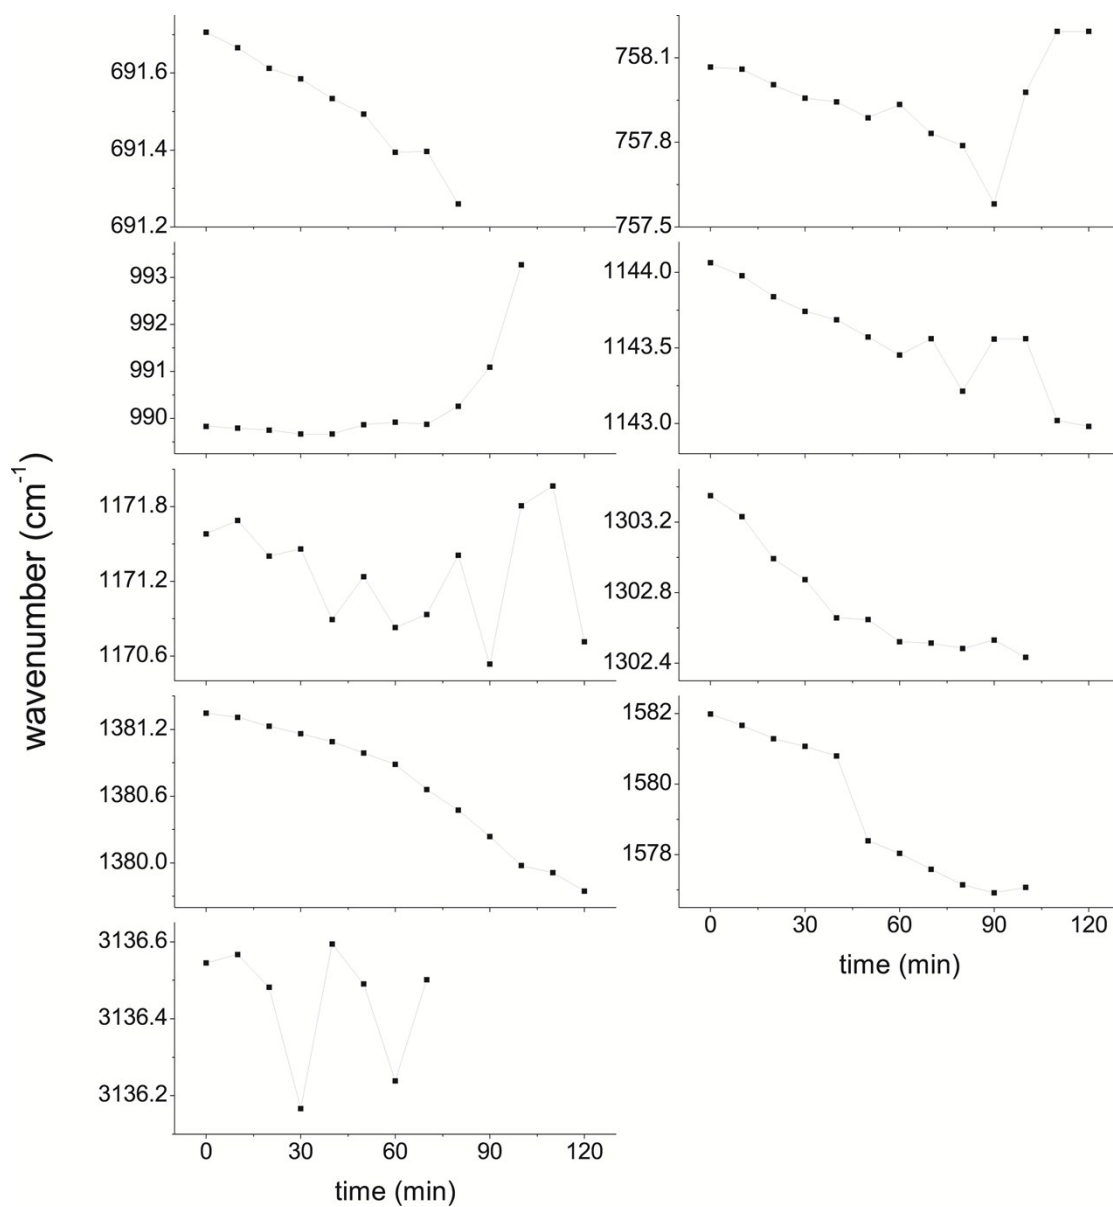

Figure S10 The peak position changes in time-dependent IR spectra of ZIF-8.

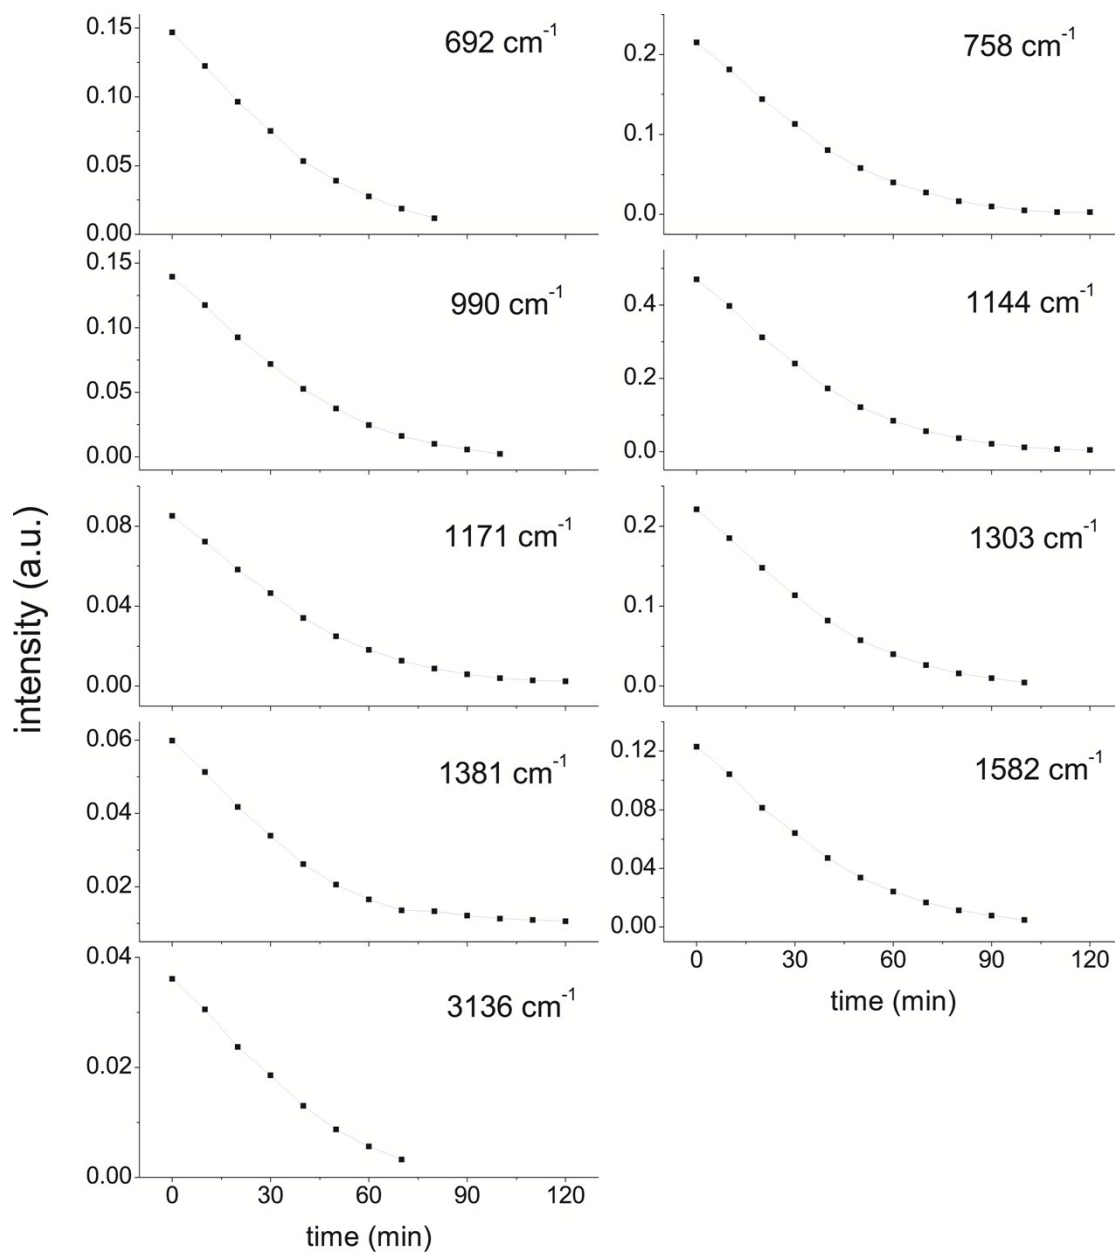

Figure S11 The peak intensity changes in time-dependent IR spectra of ZIF-8.

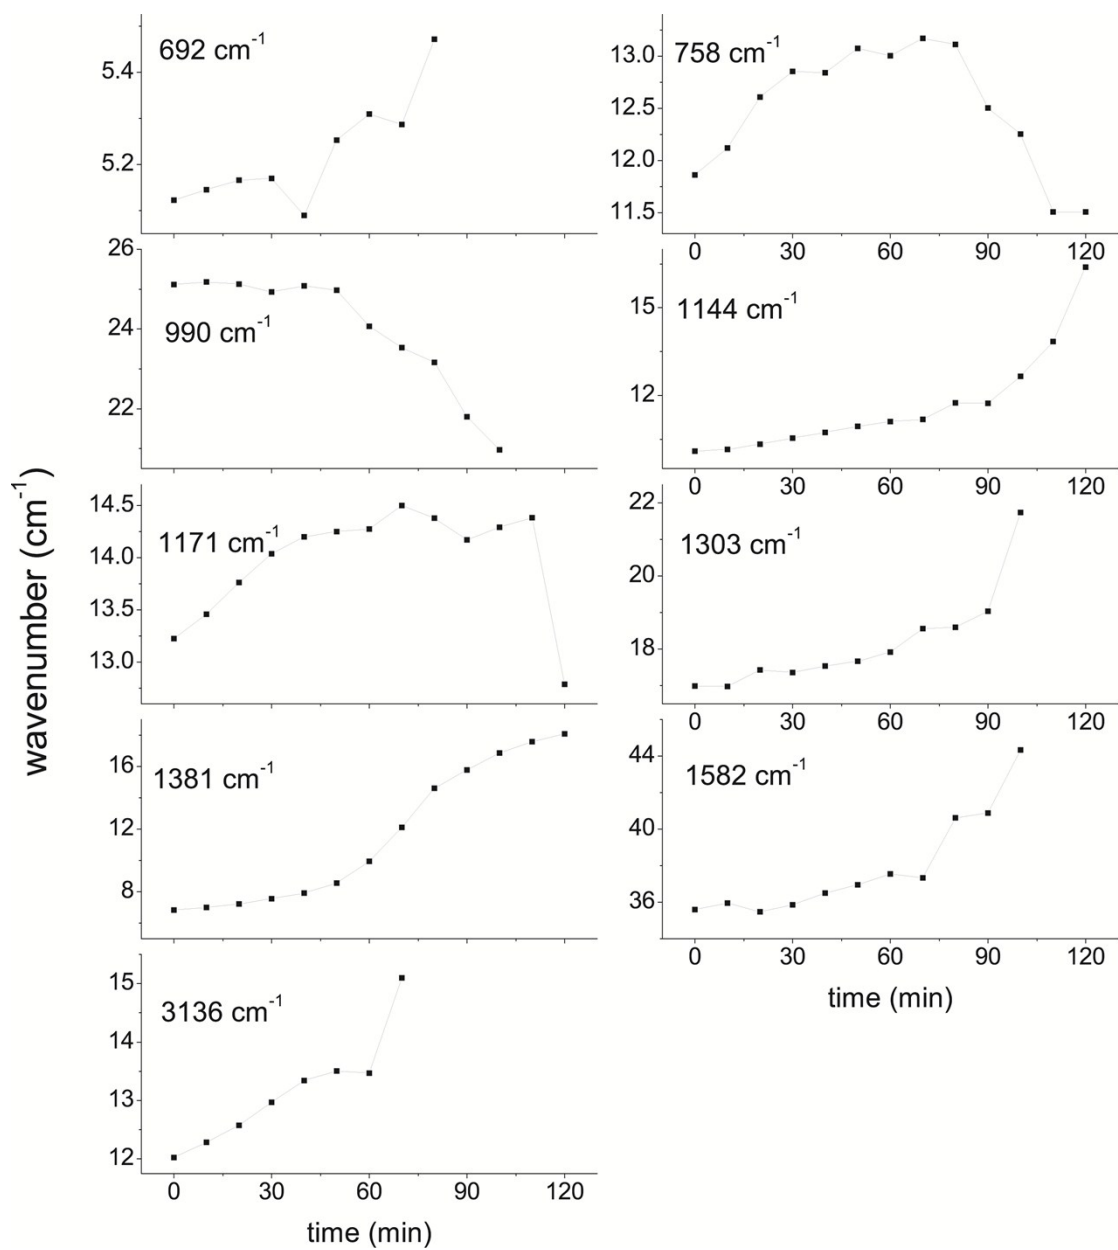

Figure S12 The peak width changes in time-dependent IR spectra of ZIF-8.

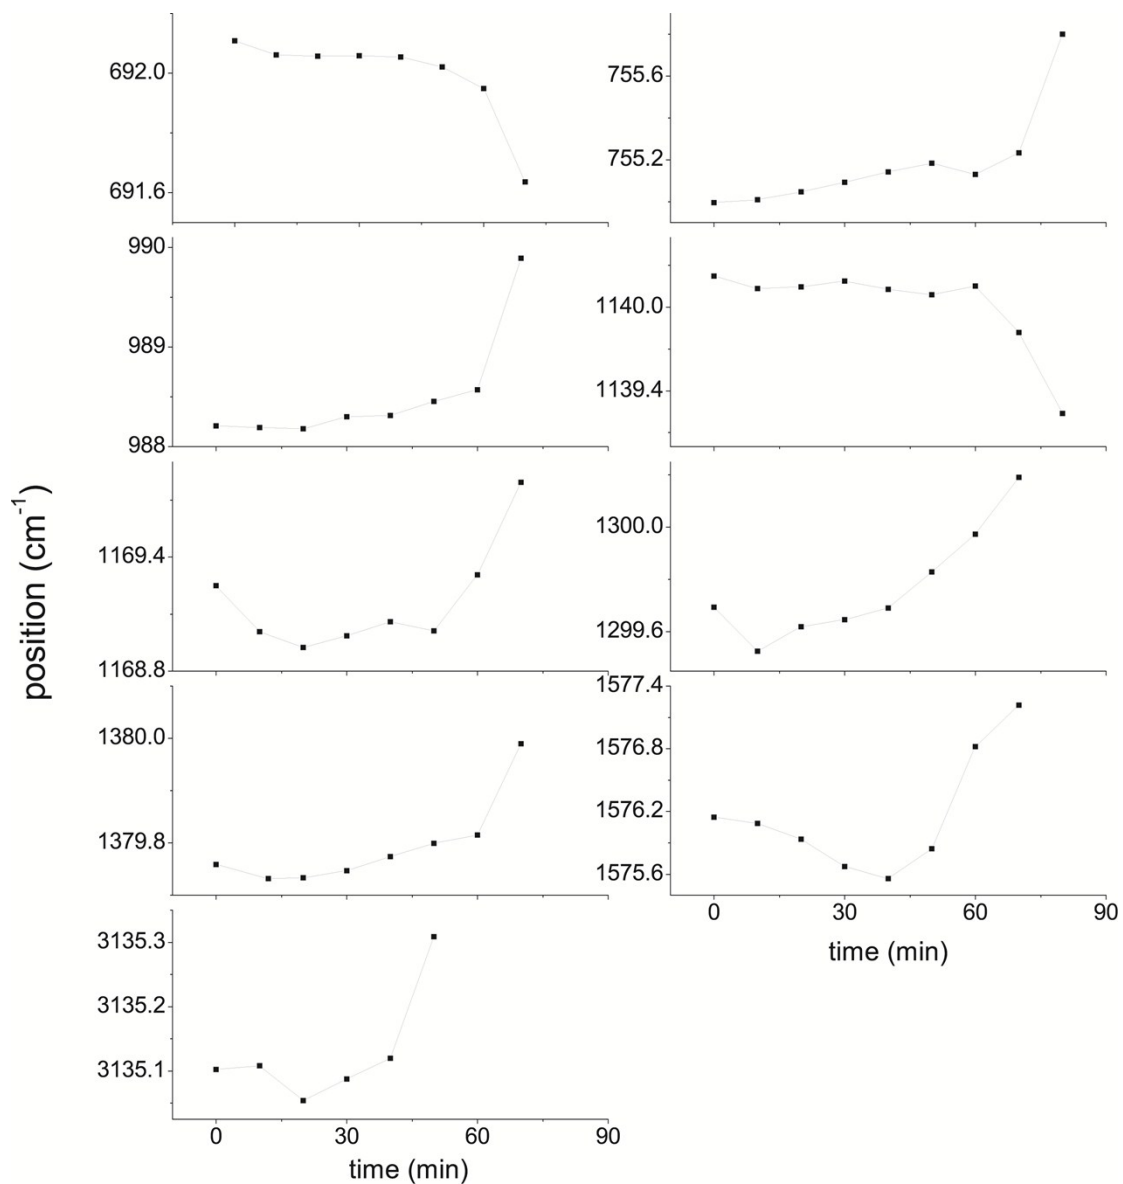

Figure S13 The peak position changes in time-dependent IR spectra of ZIF-67.

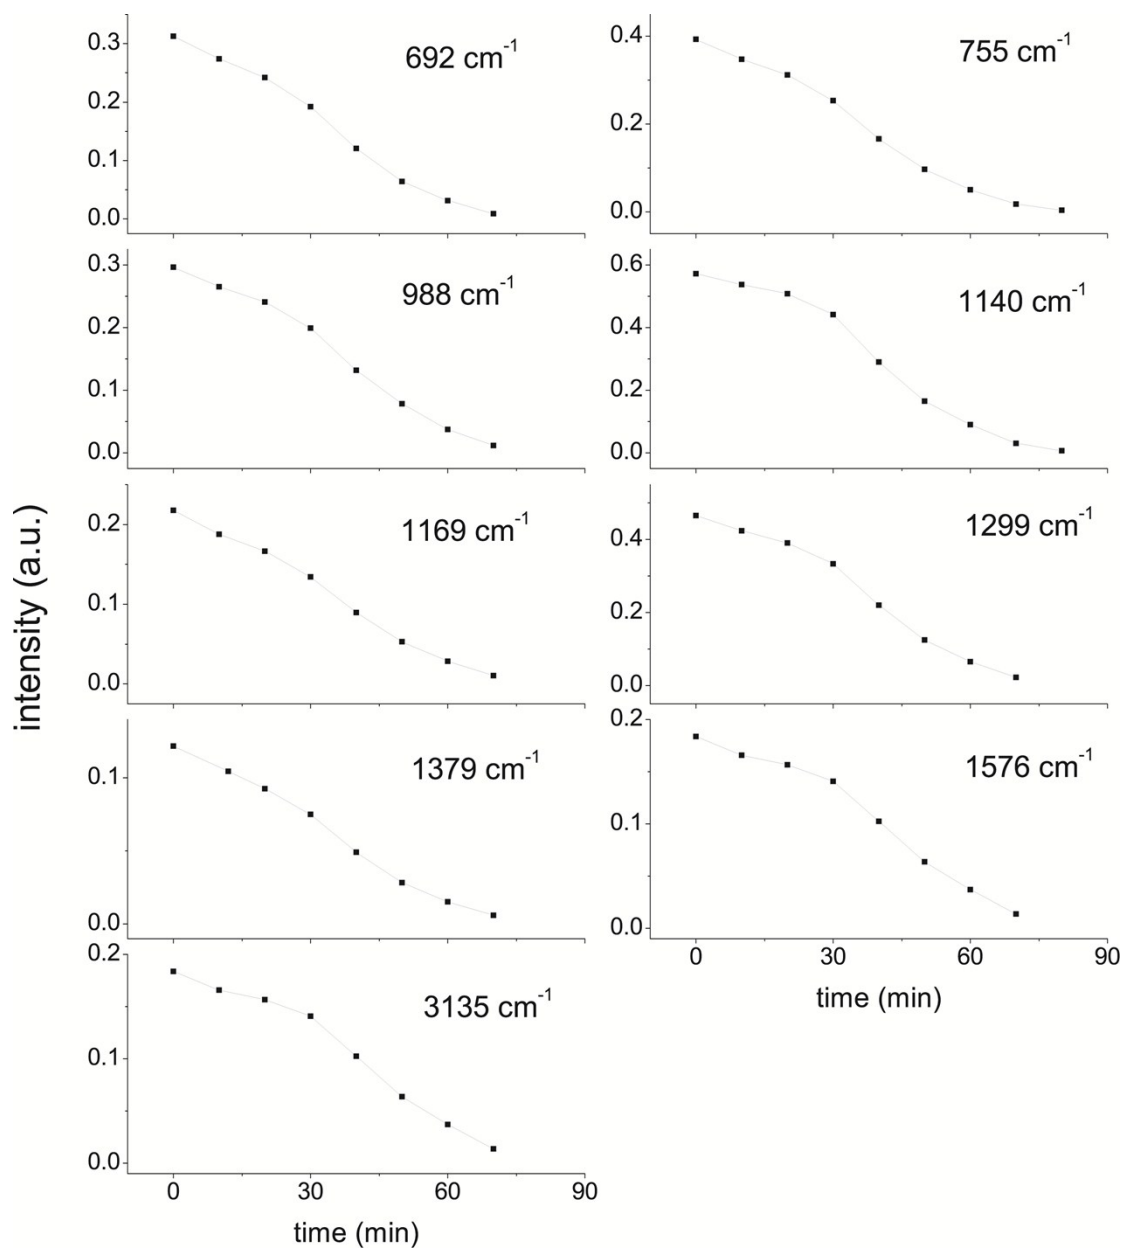

Figure S14 The peak intensity changes in time-dependent IR spectra of ZIF-67.



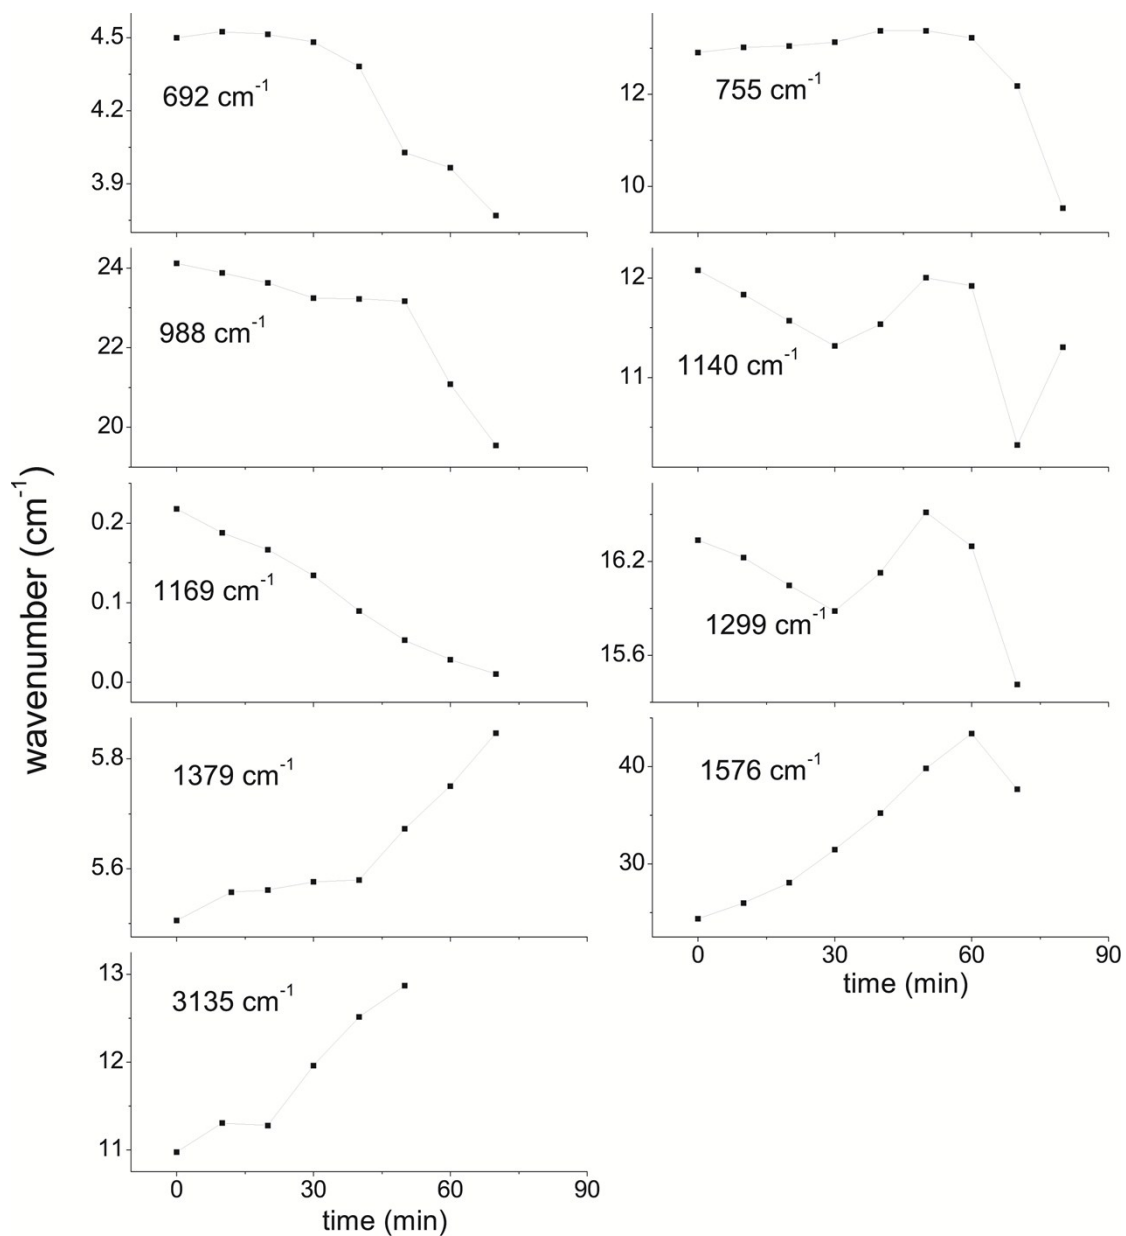

Figure S15 The peak width changes in time-dependent IR spectra of ZIF-67.

Table S2 The fitted results of  $H_{\text{ring}}$  wagging intensity vs time plots to Avrami's model for both ZIF-8 and ZIF-67

|     | ZIF-8         | ZIF-67        |
|-----|---------------|---------------|
| $k$ | 0.0252±0.0001 | 0.0213±0.0003 |
| $n$ | 1.33±0.01     | 2.7±0.1       |

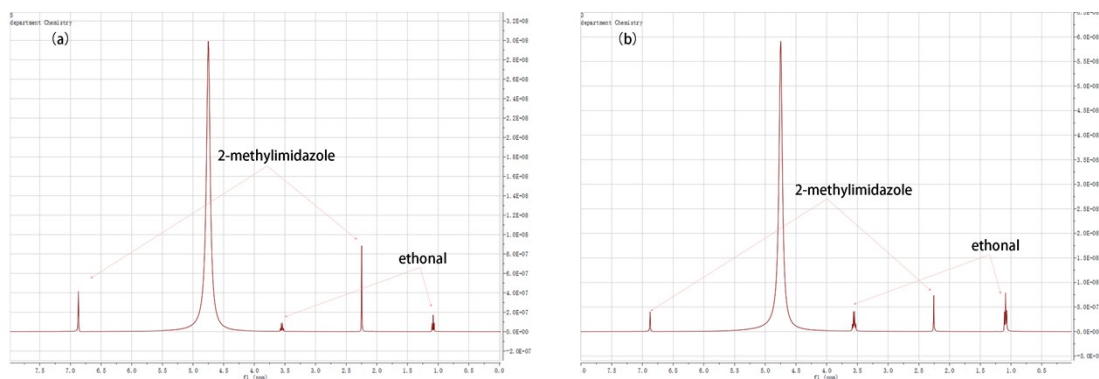

Figure S16 Solution NMR spectra of heated ZIF-8 (a) and ZIF-67 (b). ZIF-8 was heated at 350 °C for 20 minutes and ZIF-67 was heated at 300 °C for 10 minutes. The heated samples were immersed in  $\text{Na}_2\text{S}$  deuterium oxide solution to obtain the solution for NMR measurements. It is clear that there are only 2-methylimidazole peaks and ethonal peaks (the samples were rinsed with ethonal). No other organic peaks were observed.
